# Supplementary material
Source: Springer Nature journal article supplement (https://www.springermedizin.de/resource/supplementary/12957_2012_1166_MOESM2_ESM.pdf/9561838)

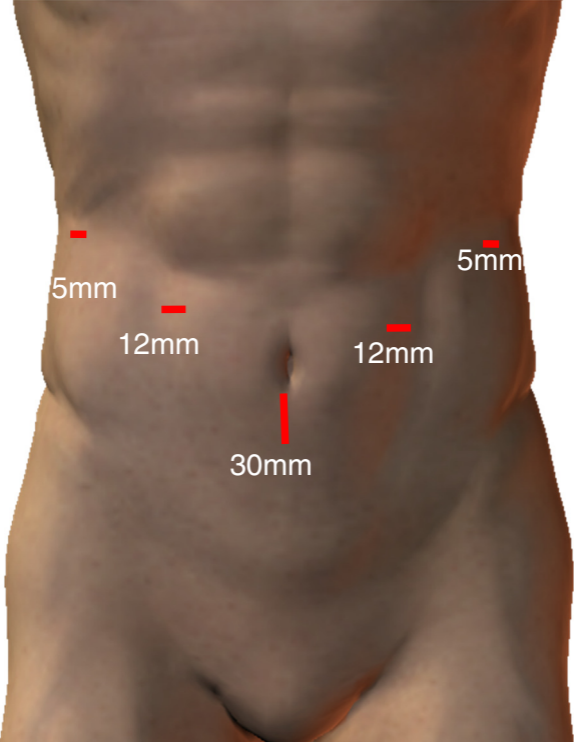

5mm

5mm

12mm

12mm

30mm

Supplement: MOESM2 [file 9561838]
